# Supplementary material for: Novel histone acetylation-related lncRNA signature for predicting prognosis and tumor microenvironment in esophageal carcinoma
Source: Aging (Albany NY). 2024 Mar 13;16(6):5163–83. doi: 10.18632/aging.205636 (PMC11006502; doi:10.18632/aging.205636)
Supplement: Supplementary Figure 1 [file aging-16-205636-s001.pdf]

## SUPPLEMENTARY FIGURE

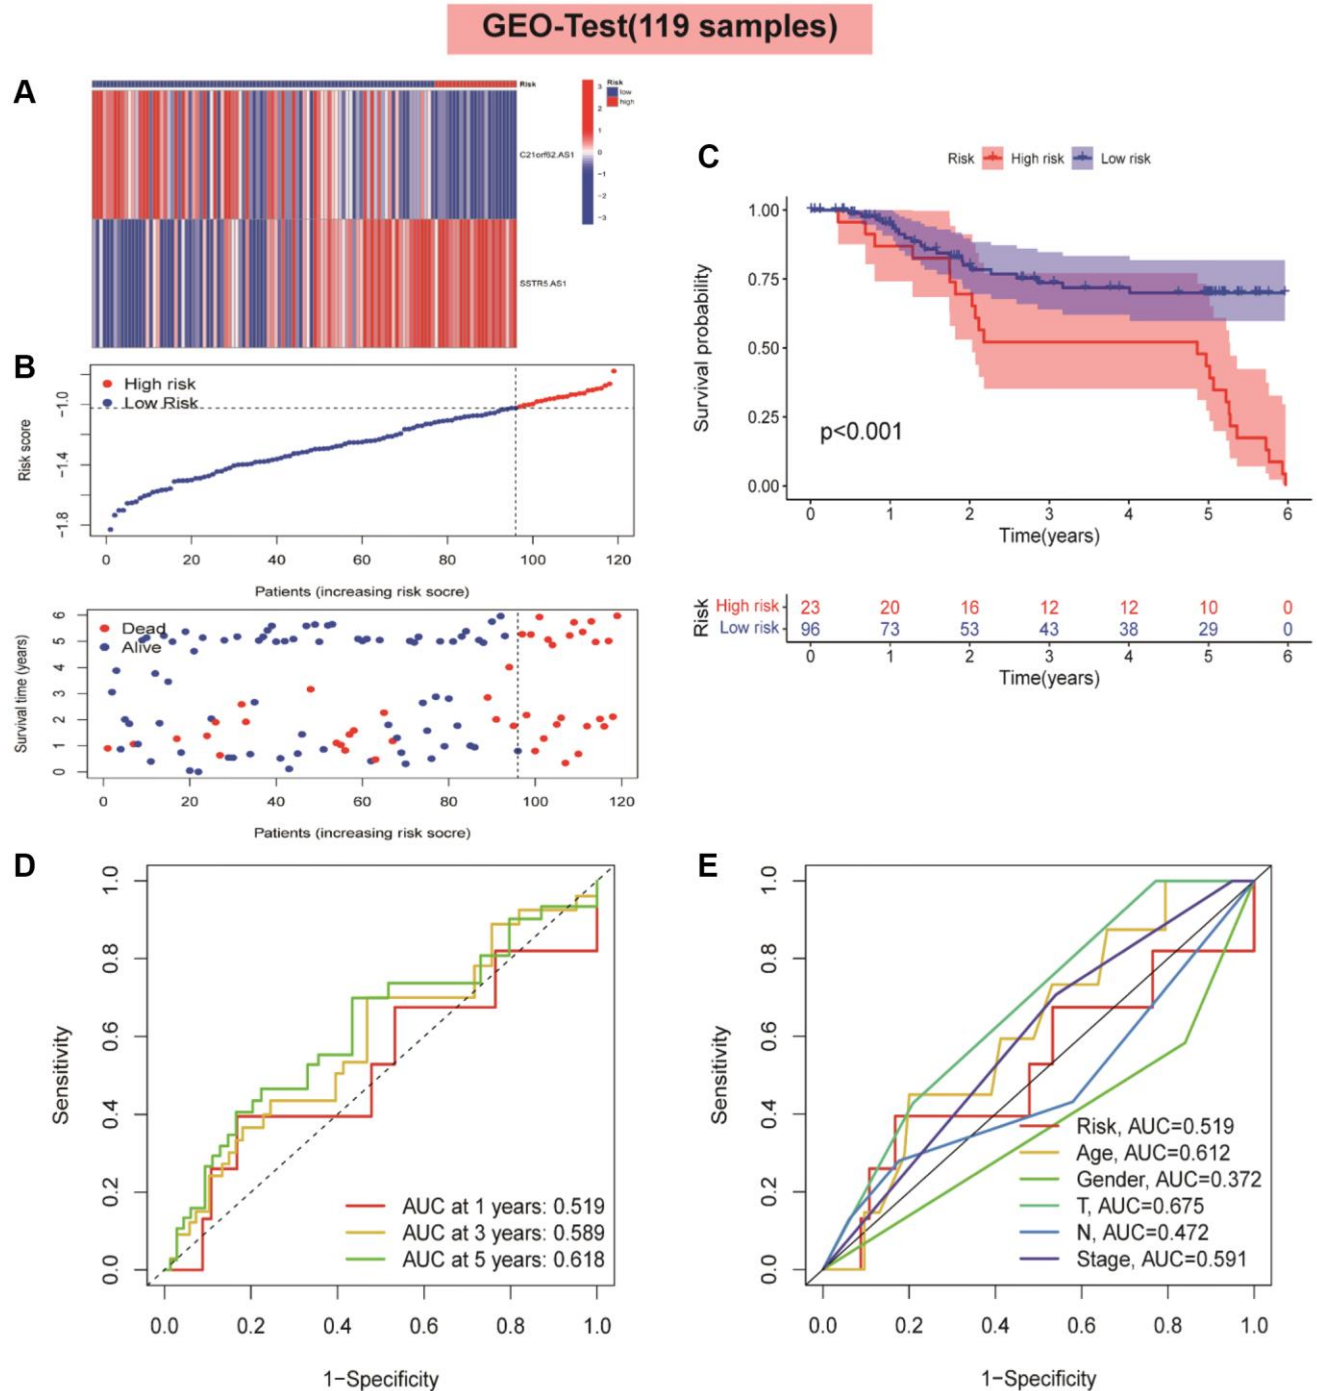

**Supplementary Figure 1. Validation of risk signature based on two HARlncRNAs in the GEO cohort.** (A, B) The risk score distribution, survival status, and heatmap for the expressions of the two lncRNAs in the validation set. (C) The survival analysis in the validation set. (D, E) ROC curve analysis of the accuracy of the model to predict patient prognosis at 1, 3, and 5 years in the validation sets.
