# Supplementary material for: Novel histone acetylation-related lncRNA signature for predicting prognosis and tumor microenvironment in esophageal carcinoma
Source: publisher site journal article supplement (doi:10.18632/aging.205636), 2024-03-13
Supplement: Supplementary file [file aging-v16i6-205636-supplementary-material-SD2.pdf]

## SUPPLEMENTARY TABLE

Supplementary Table 1. Summary of 52 recognized histone acetylation-related genes.

| Gene    | Type                |
|---------|---------------------|
| HDAC4   | Histone acetylation |
| HDAC5   | Histone acetylation |
| HDAC2   | Histone acetylation |
| HDAC3   | Histone acetylation |
| HDAC10  | Histone acetylation |
| HDAC1   | Histone acetylation |
| HDAC11  | Histone acetylation |
| HDAC8   | Histone acetylation |
| HDAC9   | Histone acetylation |
| HDAC6   | Histone acetylation |
| HDAC7   | Histone acetylation |
| KAT8    | Histone acetylation |
| EP300   | Histone acetylation |
| KAT7    | Histone acetylation |
| BRD4    | Histone acetylation |
| BRD3    | Histone acetylation |
| BRD2    | Histone acetylation |
| CREBBP  | Histone acetylation |
| SIRT2   | Histone acetylation |
| KAT2B   | Histone acetylation |
| KAT2A   | Histone acetylation |
| KAT6B   | Histone acetylation |
| KAT6A   | Histone acetylation |
| HAT1    | Histone acetylation |
| BRDT    | Histone acetylation |
| TAF1    | Histone acetylation |
| YEATS4  | Histone acetylation |
| BAZ2B   | Histone acetylation |
| ATAD2B  | Histone acetylation |
| DPF1    | Histone acetylation |
| DPF2    | Histone acetylation |
| DPF3    | Histone acetylation |
| BPTF    | Histone acetylation |
| PBRM1   | Histone acetylation |
| SMARCA2 | Histone acetylation |
| SMARCA4 | Histone acetylation |
| ATF2    | Histone acetylation |
| CIITA   | Histone acetylation |
| KAT5    | Histone acetylation |
| BRD9    | Histone acetylation |
| BRD7    | Histone acetylation |
| NCOA1   | Histone acetylation |
| NCOA2   | Histone acetylation |
| NCOA3   | Histone acetylation |

|       |                     |
|-------|---------------------|
| SIRT4 | Histone acetylation |
| OGA   | Histone acetylation |
| SIRT5 | Histone acetylation |
| SIRT6 | Histone acetylation |
| SIRT7 | Histone acetylation |
| SIRT1 | Histone acetylation |
| SIRT3 | Histone acetylation |
| CLOCK | Histone acetylation |

---
